# Supplementary material for: Electronic structure of twisted and planar rubrene molecules: a density functional study
Source: Royal Society of Chemistry journal article supplement (doi:10.1039/c8cp02318b), 2018-01-01
Supplement: c8cp02318b1.pdf [file c8cp02318b1.pdf]

## Supporting Information

### Electronic Structure of Twisted and Planar Rubrene Molecule: A Density Functional Study

Table S1: Excitation energy, corresponding transition and oscillator strength ( $f$ ) for the different carbon excitation centres (as mentioned in the figure 4 and 5) by considering them as an excitation center. Highlight in colours are done to show the origin of the different experimentally observed peaks only. Experimentally unobserved transitions are not highlighted. Peaks highlighted with a particular colour indicates similarity in energy of transition.

| Excitation Centre (carbon atom number) | Excitation energy (eV) | $f \geq 10^{-3}$ | Transition levels   | Ionization potential (eV) |
|----------------------------------------|------------------------|------------------|---------------------|---------------------------|
| TC1                                    | 284.20                 | 14.7             | 1s → LUMO+1         | 290.57                    |
|                                        | 287.30                 | 1.45             | 1s → Rydberg states |                           |
|                                        | 287.35                 | 1.78             | 1s → Rydberg states |                           |
|                                        | 288.12                 | 2.06             | 1s → Rydberg states |                           |
|                                        | 291.18                 | 3.02             | 1s → Rydberg states |                           |
| TC23                                   | 283.70                 | 3.83             | 1s → LUMO           | 290.23                    |
|                                        | 285.06                 | 9.40             | 1s → LUMO+1         |                           |
|                                        | 290.29                 | 1.11             | 1s → Rydberg states |                           |
|                                        | 291.37                 | 1.38             | 1s → Rydberg states |                           |
| TC24                                   | 284.19                 | 1.73             | 1s → LUMO           | 290.70                    |

|      |        |      |                   |        |
|------|--------|------|-------------------|--------|
|      | 285.64 | 8.78 | 1s→LUMO+1         |        |
|      | 286.12 | 1.95 | 1s→LUMO+3         |        |
|      | 287.00 | 1.23 | 1s→LUMO+11        |        |
|      | 289.65 | 1.21 | 1s→Rydberg states |        |
|      | 289.85 | 1.52 | 1s→Rydberg states |        |
|      | 289.89 | 1.29 | 1s→Rydberg states |        |
| TC25 | 283.84 | 3.73 | 1s→LUMO           | 290.32 |
|      | 285.33 | 8.63 | 1s→LUMO+1         |        |
|      | 286.62 | 1.60 | 1s→LUMO+11        |        |
|      | 286.88 | 2.23 | 1s→Rydberg states |        |
|      | 286.95 | 1.41 | 1s→Rydberg states |        |
| TC26 | 283.44 | 7.71 | 1s→LUMO           | 290.20 |
|      | 285.33 | 2.44 | 1s→LUMO+1         |        |
|      | 286.49 | 2.88 | 1s→LUMO+11        |        |
|      | 286.78 | 2.58 | 1s→Rydberg states |        |
|      | 287.11 | 1.01 | 1s→Rydberg states |        |
|      | 290.91 | 1.74 | 1s→Rydberg states |        |
| TC33 | 283.59 | 3.97 | 1s→LUMO           | 290.22 |
|      | 285.05 | 9.20 | 1s→LUMO+1         |        |
|      | 289.28 | 1.08 | 1s→Rydberg states |        |
|      | 290.30 | 1.03 | 1s→Rydberg states |        |
| TC34 | 284.19 | 1.64 | 1s→LUMO           | 290.70 |
|      | 285.65 | 8.98 | 1s→LUMO+1         |        |
|      | 286.11 | 1.95 | 1s→LUMO+3         |        |
|      | 286.99 | 1.23 | 1s→LUMO+11        |        |
|      | 289.69 | 1.18 | 1s→Rydberg states |        |
|      | 289.77 | 2.18 | 1s→Rydberg states |        |

|      |        |       |                   |        |
|------|--------|-------|-------------------|--------|
|      | 289.67 | 1.30  | 1s→Rydberg states |        |
|      | 290.86 | 1.19  | 1s→Rydberg states |        |
|      | 291.00 | 1.03  | 1s→Rydberg states |        |
| TC35 | 283.82 | 3.66  | 1s→LUMO           | 290.33 |
|      | 285.28 | 8.75  | 1s→LUMO+1         |        |
|      | 286.10 | 1.02  | 1s→LUMO+4         |        |
|      | 286.60 | 1.61  | 1s→LUMO+11        |        |
|      | 286.86 | 2.21  | 1s→Rydberg states |        |
|      | 286.93 | 1.44  | 1s→Rydberg states |        |
| TC36 | 283.42 | 7.80  | 1s→LUMO           | 290.19 |
|      | 285.31 | 1.36  | 1s→LUMO+1         |        |
|      | 285.33 | 1.15  | 1s→LUMO+2         |        |
|      | 286.47 | 2.99  | 1s→LUMO+11        |        |
|      | 286.76 | 2.55  | 1s→Rydberg states |        |
|      | 291.31 | 1.51  | 1s→Rydberg states |        |
| TC27 | 285.51 | 15.00 | 1s→LUMO+1         | 290.89 |
|      | 289.53 | 1.48  | 1s→Rydberg states |        |
| TC28 | 285.27 | 14.28 | 1s→LUMO+2         | 290.52 |
|      | 287.33 | 1.10  | 1s→LUMO+14        |        |
|      | 289.20 | 1.71  | 1s→Rydberg states |        |
|      | 289.35 | 1.61  | 1s→Rydberg states |        |
| TC29 | 284.22 | 1.21  | 1s→LUMO+1         | 290.47 |
|      | 285.23 | 13.66 | 1s→LUMO+2         |        |
| TC30 | 285.41 | 15.05 | 1s→LUMO+1         | 290.72 |
|      | 286.97 | 1.51  | 1s→LUMO+8         |        |
| TC31 | 285.39 | 14.63 | 1s→LUMO+3         | 290.71 |
|      | 286.90 | 1.14  | 1s→LUMO+9         |        |

|      |        |       |                     |        |
|------|--------|-------|---------------------|--------|
|      | 289.37 | 1.07  | 1s → Rydberg states |        |
| TC32 | 284.37 | 1.53  | 1s → LUMO+2         | 290.58 |
|      | 285.26 | 12.38 | 1s → LUMO+3         |        |
|      | 289.30 | 1.02  | 1s → Rydberg states |        |
| TC37 | 285.51 | 14.92 | 1s → LUMO+1         | 290.89 |
|      | 289.52 | 1.54  | 1s → Rydberg states |        |
| TC38 | 284.22 | 1.27  | 1s → LUMO           | 290.46 |
|      | 285.24 | 13.59 | 1s → LUMO+2         |        |
| TC39 | 285.27 | 14.20 | 1s → LUMO+1         | 290.51 |
|      | 287.31 | 1.08  | 1s → Rydberg states |        |
|      | 289.20 | 1.74  | 1s → Rydberg states |        |
|      | 289.35 | 1.42  | 1s → Rydberg states |        |
| TC40 | 285.39 | 14.62 | 1s → LUMO+1         | 290.70 |
|      | 286.90 | 1.05  | 1s → LUMO+8         |        |
|      | 287.45 | 1.09  | 1s → Rydberg states |        |
| TC41 | 285.42 | 15.04 | 1s → LUMO+1         | 290.71 |
| TC42 | 284.35 | 1.59  | 1s → LUMO+1         | 290.57 |
|      | 285.26 | 12.23 | 1s → LUMO+2         |        |
|      | 286.74 | 1.42  | 1s → LUMO+9         |        |

Table S2: Excitation energy, corresponding transition between molecular orbitals and oscillator strength ( $f$ ) for the different carbon sites (as shown in the figure 7) by considering them as an excitation center. Highlight in colours are done to show the origin of the different experimentally observed peaks only. Experimentally unobserved transitions are not highlighted. Peaks highlighted with a particular colour indicates similarity in energy of transition.

| Excitation Centre<br>(carbon atom<br>number) | Excitation energy<br>(eV) | $f \geq 10^{-3}$ | Transition levels  | Ionization<br>potential (eV) |
|----------------------------------------------|---------------------------|------------------|--------------------|------------------------------|
| FC8                                          | 285.71                    | 11.98            | 1s→LUMO+5          | 290.86                       |
|                                              | 288.91                    | 1.33             | 1s→ Rydberg states |                              |
|                                              | 288.95                    | 1.94             | 1s→ Rydberg states |                              |
| FC9                                          | 284.46                    | 7.11             | 1s→LUMO+1          | 290.36                       |
|                                              | 286.06                    | 2.27             | 1s→LUMO+5          |                              |
|                                              | 287.10                    | 1.41             | 1s→ Rydberg states |                              |
|                                              | 287.28                    | 1.91             | 1s→ Rydberg states |                              |
| FC10                                         | 285.05                    | 1.48             | 1s→LUMO+1          | 290.73                       |
|                                              | 286.34                    | 8.82             | 1s→LUMO+5          |                              |
|                                              | 287.20                    | 1.08             | 1s→LUMO+10         |                              |
|                                              | 287.29                    | 1.00             | 1s→LUMO+11         |                              |
|                                              | 287.69                    | 1.15             | 1s→ Rydberg states |                              |
|                                              | 290.68                    | 1.37             | 1s→Rydberg states  |                              |
|                                              | 290.89                    | 2.34             | 1s→Rydberg states  |                              |
| FC11                                         | 284.43                    | 4.36             | 1s→LUMO+1          | 290.33                       |
|                                              | 285.78                    | 7.01             | 1s→LUMO+4          |                              |
|                                              | 286.83                    | 1.04             | 1s→ Rydberg states |                              |
|                                              | 290.62                    | 1.84             | 1s→Rydberg states  |                              |
| FC12                                         | 284.57                    | 4.24             | 1s→LUMO            | 290.36                       |
|                                              | 285.87                    | 7.22             | 1s→LUMO+2          |                              |
|                                              | 287.40                    | 1.64             | 1s→ Rydberg states |                              |
|                                              | 287.51                    | 1.70             | 1s→ Rydberg states |                              |
|                                              | 289.18                    | 1.33             | 1s→ Rydberg states |                              |
| FC24                                         | 285.21                    | 1.57             | 1s→LUMO+3          | 290.92                       |
|                                              | 289.15                    | 1.52             | 1s→ Rydberg states |                              |
|                                              | 289.18                    | 1.61             | 1s→ Rydberg states |                              |
| FC25                                         | 285.10                    | 14.54            | 1s→LUMO+3          | 290.60                       |
|                                              | 287.87                    | 1.02             | 1s→ Rydberg states |                              |
|                                              | 289.94                    | 2.11             | 1s→ Rydberg states |                              |
|                                              | 289.06                    | 1.16             | 1s→ Rydberg states |                              |
| FC26                                         | 285.41                    | 14.36            | 1s→LUMO+5          | 290.80                       |
|                                              | 286.92                    | 1.58             | 1s→ Rydberg states |                              |
|                                              | 287.68                    | 1.06             | 1s→ Rydberg states |                              |
|                                              | 289.52                    | 1.63             | 1s→ Rydberg states |                              |
| FC27                                         | 284.70                    | 1.58             | 1s→LUMO+3          | 290.71                       |
|                                              | 285.07                    | 10.42            | 1s→LUMO+4          |                              |
|                                              | 286.52                    | 1.22             | 1s→ Rydberg states |                              |
|                                              | 288.98                    | 1.76             | 1s→ Rydberg states |                              |

|      |        |       |                     |        |
|------|--------|-------|---------------------|--------|
| FC28 | 284.98 | 9.15  | 1s → LUMO+4         | 290.79 |
|      | 285.06 | 5.83  | 1s → LUMO+5         |        |
|      | 286.65 | 1.15  | 1s → Rydberg states |        |
|      | 287.07 | 1.16  | 1s → Rydberg states |        |
|      | 288.95 | 1.69  | 1s → Rydberg states |        |
| FC29 | 284.95 | 14.46 | 1s → LUMO+3         | 290.58 |
|      | 288.86 | 1.53  | 1s → Rydberg states |        |
|      | 288.89 | 1.78  | 1s → Rydberg states |        |
